# Supplementary material
Source: PubMed Central journal article supplement (PMC6814565)
Supplement: NIHMS1538126-supplement-SDC.pdf [file NIHMS1538126-supplement-SDC.pdf]

**Appendix 1. Comparison Between Gravid Patients Stratified by Trimester of Pregnancy When Hurricane Harvey Made Landfall**

| Variable                               | Third trimester during Hurricane (N = 1,378) | Second trimester during Hurricane (N = 1,309) | Crude OR (95% CI)/aOR (95% CI) 3 <sup>rd</sup> vs. 2 <sup>nd</sup> trimester | First trimester during Hurricane (N = 1,155) | Crude OR (95% CI)/aOR (95% CI) 3 <sup>rd</sup> vs. 1 <sup>st</sup> trimester | Crude OR (95% CI)/aOR (95% CI) 2 <sup>nd</sup> vs. 1 <sup>st</sup> trimester |
|----------------------------------------|----------------------------------------------|-----------------------------------------------|------------------------------------------------------------------------------|----------------------------------------------|------------------------------------------------------------------------------|------------------------------------------------------------------------------|
| Preterm Birth <37 weeks – N (%)        | 140 (10.1)                                   | 109 (8.3)                                     | 1.24 (0.96 – 1.62)<br>1.25 (0.93 – 1.67)                                     | 121 (10.5)                                   | 0.97 (0.75 – 1.25)<br>0.87 (0.66 – 1.16)                                     | 0.77 (0.59 – 1.02)<br>0.72 (0.53 – 0.97)                                     |
| Premature rupture of membranes – N (%) | 12 (0.9)                                     | 6 (0.5)                                       | 1.90 (0.71 – 5.10)                                                           | 10 (0.9)                                     | 1.00 (0.43 – 2.34)                                                           | 0.53 (0.19 – 1.46)                                                           |
| Delivery by cesarean section – N (%)   | 489 (35.5)                                   | 456 (34.8)                                    | 1.02 (0.88 – 1.21)<br>0.94 (0.79 – 1.12)                                     | 392 (33.9)                                   | 1.07 (0.91 – 1.26)<br>1.04 (0.87 – 1.25)                                     | 1.04 (0.88 – 1.23)<br>1.12 (0.95 – 1.33)                                     |

|                                             |            |            |                                          |            |                                          |                                          |
|---------------------------------------------|------------|------------|------------------------------------------|------------|------------------------------------------|------------------------------------------|
| Infections during labor admission – N (%)   | 418 (30.3) | 408 (31.2) | 0.96 (0.82 – 1.13)<br>0.97 (0.81 – 1.16) | 387 (33.5) | 0.86 (0.73 – 1.02)<br>0.85 (0.71 – 1.02) | 0.90 (0.76 – 1.06)<br>0.86 (0.71 – 1.03) |
| GBS colonization Intrapartum – N (%)        | 297 (21.6) | 305 (23.3) | 0.90 (0.75 – 1.08)<br>0.90 (0.74 – 1.09) | 260 (22.5) | 0.94 (0.78 – 1.14)<br>0.90 (0.73 – 1.10) | 1.05 (0.87 – 1.26)<br>0.97 (0.79 – 1.19) |
| Small for gestational age – N (%)           | 153 (11.1) | 137 (10.5) | 1.07 (0.84 – 1.36)<br>1.05 (0.80 – 1.38) | 130 (11.3) | 0.98 (0.77 – 1.26)<br>0.94 (0.71 – 1.24) | 0.92 (0.71 – 1.19)<br>0.89 (0.67 – 1.18) |
| Composite Maternal Morbidity – N (%)        | 197 (14.3) | 192 (14.7) | 0.97 (0.78 – 1.20)<br>0.97 (0.76 – 1.22) | 175 (15.2) | 0.93 (0.75 – 1.16)<br>1.00 (0.78 – 1.28) | 0.96 (0.77 – 1.20)<br>1.05 (0.82 – 1.34) |
| Hypertensive disorders of pregnancy – N (%) | 98 (7.1)   | 98 (7.5)   | 0.95 (0.71 – 1.27)<br>0.86 (0.63 – 1.18) | 89 (7.7)   | 0.92 (0.68 – 1.24)<br>0.91 (0.66 – 1.27) | 0.97 (0.72 – 1.31)<br>1.04 (0.75 – 1.43) |

Mendez-Figueroa H, Chauhan SP, Tolcher MC, Shamsirsaz AA, Sangi-Haghepeykar H, Pace RM, et al. Peripartum outcomes before and after Hurricane Harvey. *Obstet Gynecol* 2019;134.

The authors provided this information as a supplement to their article.

©2019 American College of Obstetricians and Gynecologists.

|                                                        |            |            |                                          |            |                                          |                                          |
|--------------------------------------------------------|------------|------------|------------------------------------------|------------|------------------------------------------|------------------------------------------|
| Blood transfusion during intrapartum admission – N (%) | 9 (0.7)    | 7 (0.5)    | 1.22 (0.45 – 3.29)                       | 8 (0.7)    | 0.94 (0.36 – 2.44)                       | 0.77 (0.28 – 2.13)                       |
| Blood transfusion postpartum – N (%)                   | 27 (2.0)   | 18 (1.4)   | 1.43 (0.79 – 2.62)                       | 18 (1.6)   | 1.26 (0.69 – 2.30)                       | 0.88 (0.45 – 1.70)                       |
| Peripartum Pulmonary edema – N (%)                     | 9 (0.7)    | 4 (0.3)    | 2.14 (0.66 – 6.98)                       | 6 (0.5)    | 1.25 (0.44 – 3.53)                       | 0.58 (0.16 – 2.08)                       |
| Arterial cord pH <7.1 – N (%)                          | 13 (0.9)   | 12 (0.9)   | 1.03 (0.47 – 2.26)                       | 13 (1.1)   | 0.84 (0.39 – 1.81)                       | 0.81 (0.37 – 1.79)                       |
| Transient tachypnea of newborn – N (%)                 | 32 (2.3)   | 29 (2.2)   | 1.05 (0.63 – 1.75)                       | 44 (3.8)   | 0.60 (0.38 – 0.95)                       | 0.57 (0.36 – 0.92)                       |
| Retinopathy of prematurity – N (%)                     | 7 (0.5)    | 11 (0.8)   | 0.60 (0.23 – 1.56)                       | 5 (0.4)    | 1.18 (0.37 – 3.72)                       | 1.95 (0.67 – 5.62)                       |
| Composite Neonatal Morbidity – N (%)                   | 178 (12.9) | 154 (11.8) | 1.11 (0.88 – 1.40)<br>1.17 (0.91 – 1.50) | 124 (10.7) | 1.23 (0.97 – 1.57)<br>1.21 (0.93 – 1.58) | 1.11 (0.86 – 1.42)<br>1.08 (0.82 – 1.42) |

Mendez-Figueroa H, Chauhan SP, Tolcher MC, Shamsirsaz AA, Sangi-Haghpeykar H, Pace RM, et al. Peripartum outcomes before and after Hurricane Harvey. *Obstet Gynecol* 2019;134.

The authors provided this information as a supplement to their article.

©2019 American College of Obstetricians and Gynecologists.

|                                          |           |           |                                          |           |                                          |                                          |
|------------------------------------------|-----------|-----------|------------------------------------------|-----------|------------------------------------------|------------------------------------------|
| Respiratory distress syndrome – N (%)    | 63 (4.6)  | 69 (5.3)  | 0.86 (0.61 – 1.23)<br>0.94 (0.64 – 1.39) | 41 (3.6)  | 1.30 (0.87 – 1.95)<br>1.23 (0.80 – 1.90) | 1.51 (1.00 – 2.24)<br>1.42 (0.93 – 2.19) |
| Suspected/proven newborn sepsis – N (%)  | 124 (9.1) | 111 (8.5) | 1.08 (0.82 – 1.40)<br>1.10 (0.82 – 1.48) | 102 (8.9) | 1.02 (0.78 – 1.34)<br>1.00 (0.74 – 1.35) | 0.95 (0.72 – 1.26)<br>0.29 (0.68 – 1.24) |
| Suspected/proven newborn seizure – N (%) | 1 (0.07)  | 0         | -                                        | 2 (0.2)   | 0.42 (0.04 – 4.63)                       | -                                        |
| Neonatal death – N (%)                   | 1 (0.07)  | 2 (0.15)  | 0.47 (0.04 – 5.24)                       | 3 (0.3)   | 0.28 (0.03 – 2.68)                       | 0.58 (0.10 – 3.52)                       |

\*Multivariate logistic regression adjusted for maternal age, race, body mass index at delivery, nulliparity, education level, insurance type, household income and marital status. aOR were only reported if the outcome of interested had a minimum number of events (80) reported thus allowing 8 adjustors to be used.
